# Supplementary material
Source: Springer Nature journal article supplement (https://www.springermedizin.de/resource/supplementary/12913_2010_1571_MOESM1_ESM.pdf/9529272)
Supplement: MOESM1 [file 9529272]

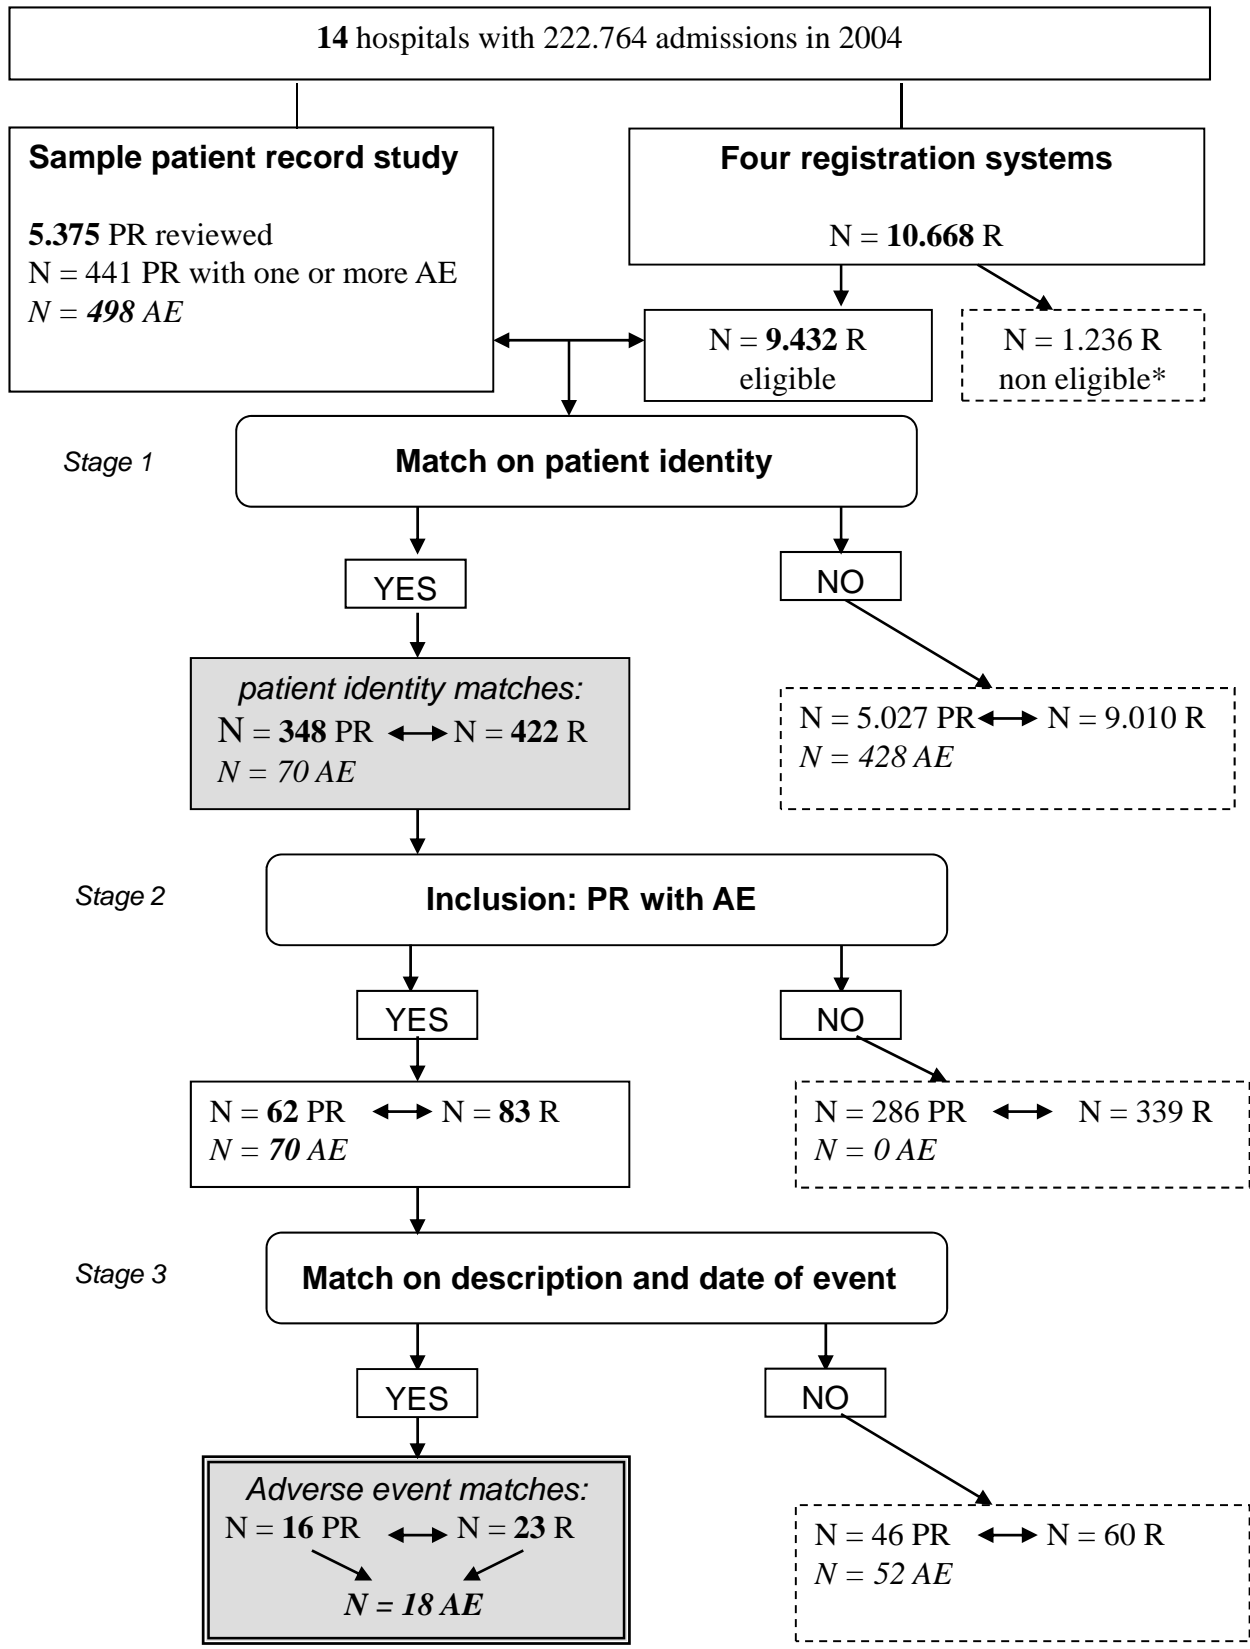

Note: R = Report; PR = Patient Record; AE = Adverse Event.

\* Incident occurred in 2003 but reported in 2004 or no sufficient patient identifiers.
